# Supplementary material for: Supramolecular hydrogel of non-steroidal anti-inflammatory drugs: preparation, characterization and ocular biocompatibility
Source: Royal Society of Chemistry journal article supplement (doi:10.1039/c6ra09615h), 2016-01-01
Supplement: c6ra09615h1.pdf [file c6ra09615h1.pdf]

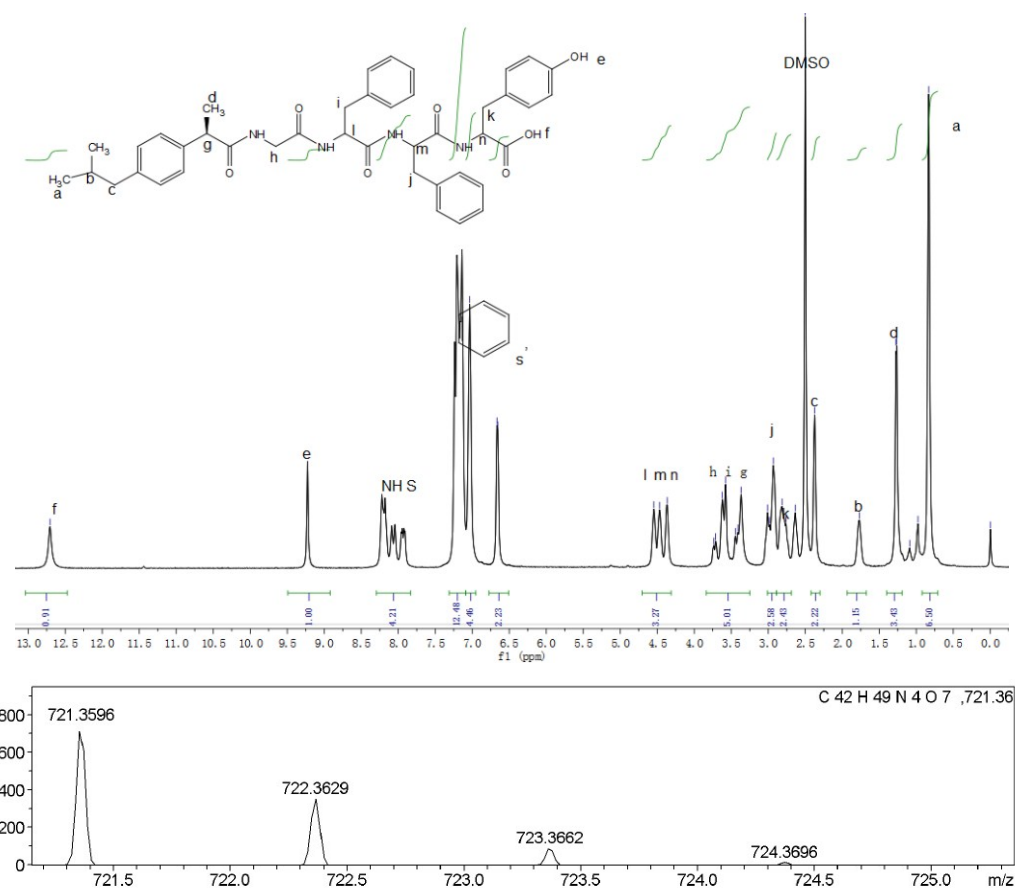

**Fig.S1** <sup>1</sup>H-NMR spectrum and MS of IPF-GFFY

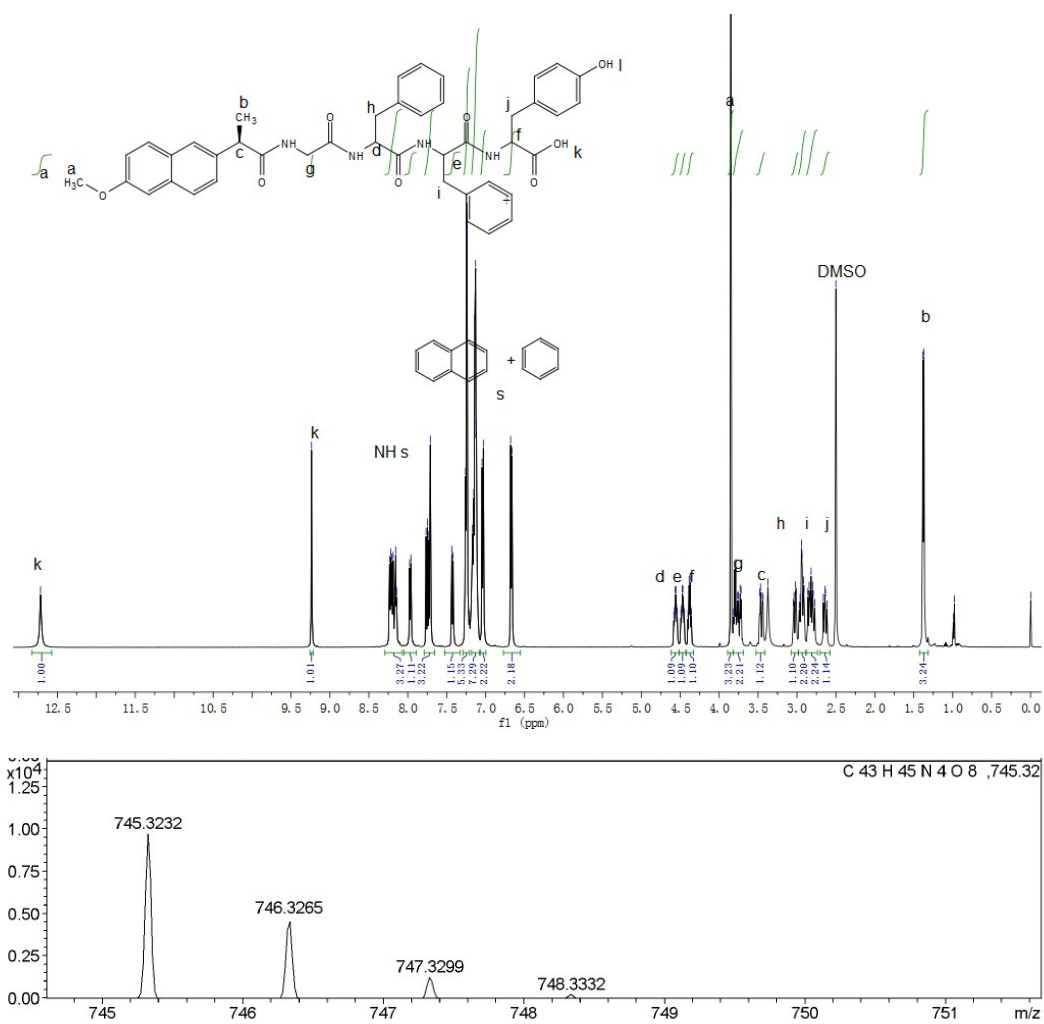

**Fig.S2**  $^1\text{H}$ -NMR spectrum and MS of NPX-GFFY

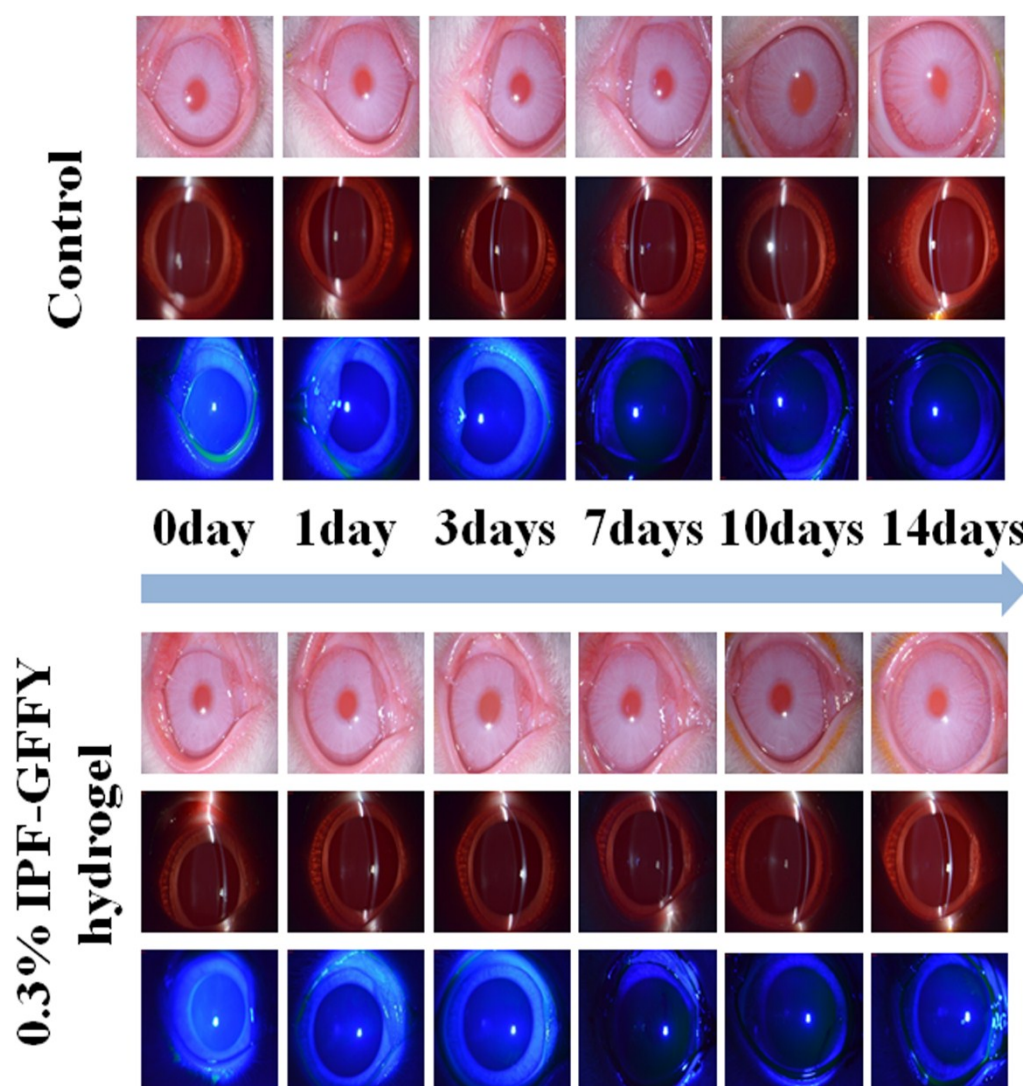

**Fig.S3** Slit lamp observation and fluorescence staining of corneal tissue after instillation of NS and 0.3% IPF-GFFY supramolecular hydrogel daily for three days.

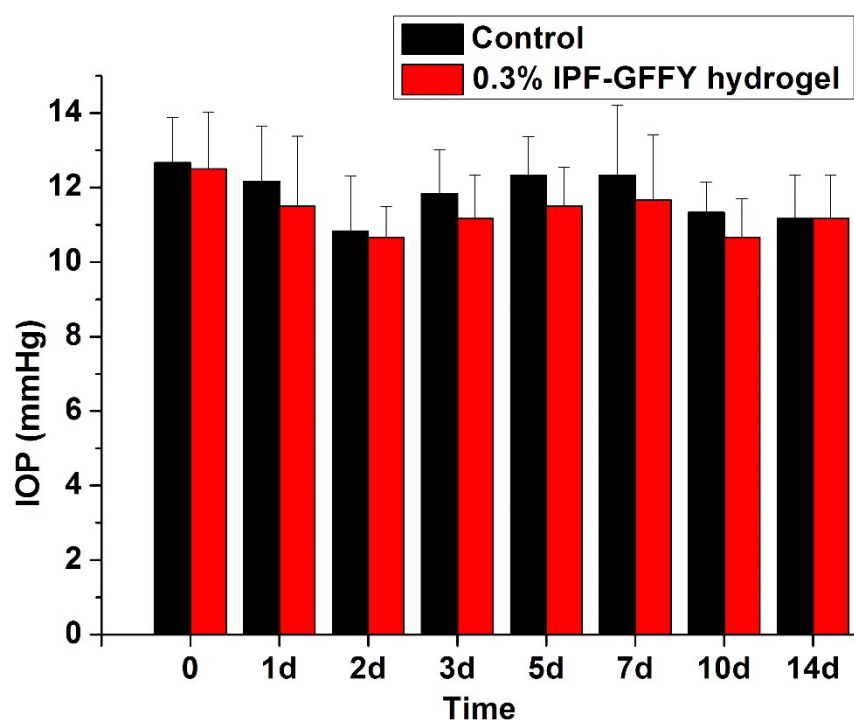

**Fig.S4** Intraocular pressure (IOP) changes of rabbit after instillation of NS and 0.3% IPF-GFFY supramolecular hydrogel daily for three days.
